# Supplementary material for: (5-Hydroxy-4-oxo-2-styryl-4H-pyridin-1-yl)-acetic Acid Derivatives as Multifunctional Aldose Reductase Inhibitors
Source: MDPI journal article supplement (doi:10.3390/molecules25215135), 2020-11-04
Supplement: s1 [file s1]

## Supporting Information

# (5-Hydroxy-4-oxo-2-styryl-4H-pyridin-1-yl)-acetic Acid Derivatives as Multifunctional Aldose Reductase Inhibitors

Huan Chen, Xin Zhang, Xiaonan Zhang, Wenchao Liu, Yanqi Lei, Changjin Zhu \* and Bing Ma \*

School of Chemistry and Chemical Engineering, Beijing Institute of Technology, Beijing 100081, China;

ch13264138964@163.com (H.C.); zx15811458104@163.com (X.Z.);

zhangxiaonan965@163.com (X.Z.); liuwhhh@163.com (W.L.); 15313252939@163.com (Y.L.)

\* Correspondence: mabing@bit.edu.cn (B.M.); zcj@bit.edu.cn (C.Z.); Tel.: +86-010-68918506 (B.M. & C.Z.)

Academic Editors: Jiang Wang, Liang-Ren Zhang, Peng Zhan, Qi-Dong You, Tian-Miao Ou and Xiao-Yun Lu

Received: 5 October 2020; Accepted: 3 November 2020; Published: 4 November 2020

## NMR spectra, high-resolution mass spectra and UV-vis spectra for tested products

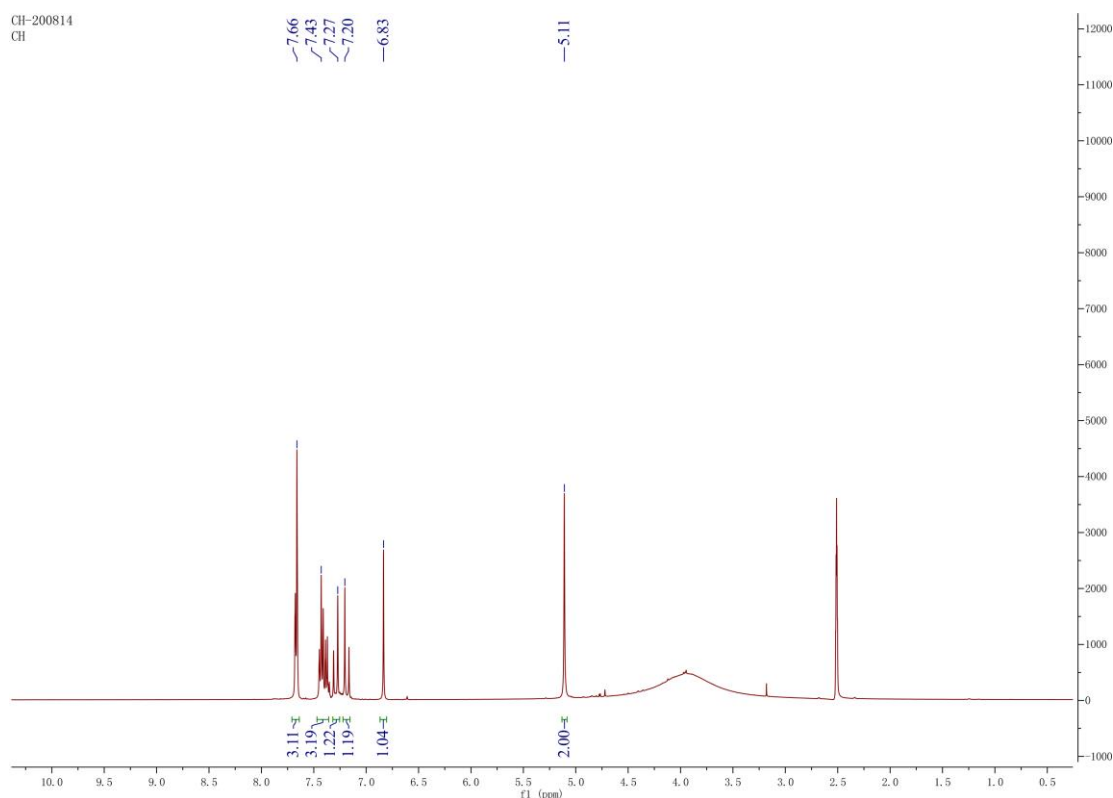

Figure S1  $^1\text{H}$ -NMR (400 MHz,  $\text{DMSO}-d_6$ ) of **7a**

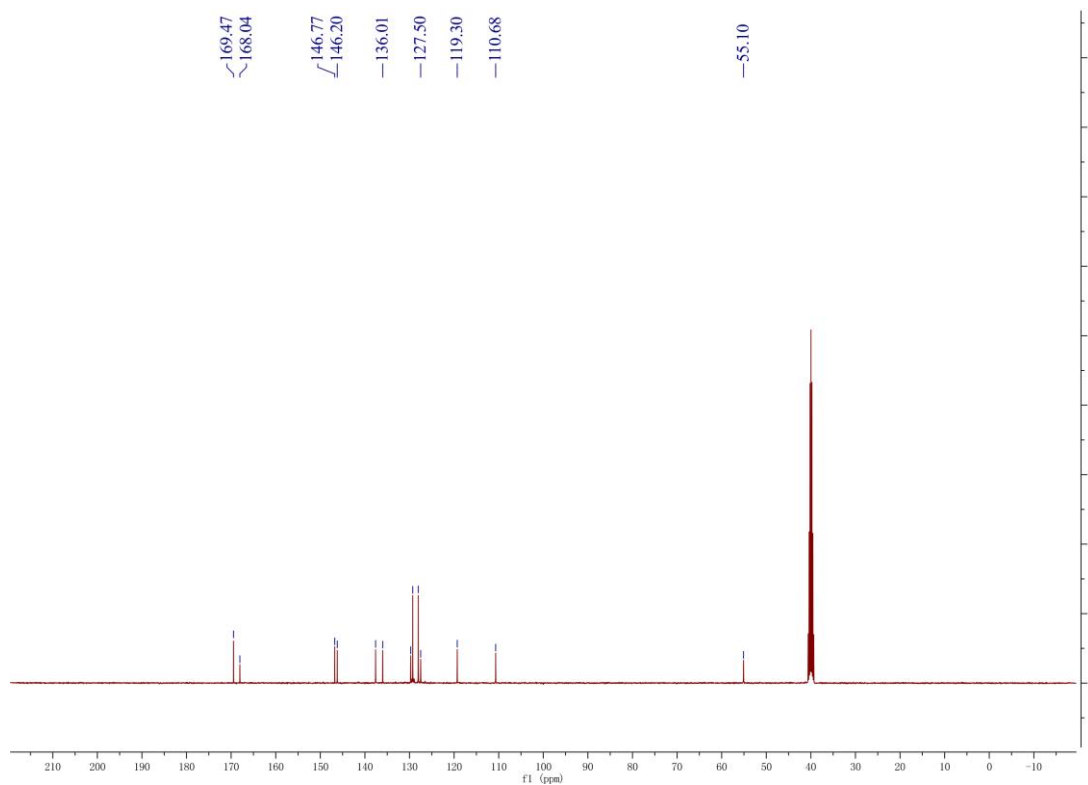Figure S2 <sup>13</sup>C-NMR (100 MHz, DMSO-*d*<sub>6</sub>) of **7a**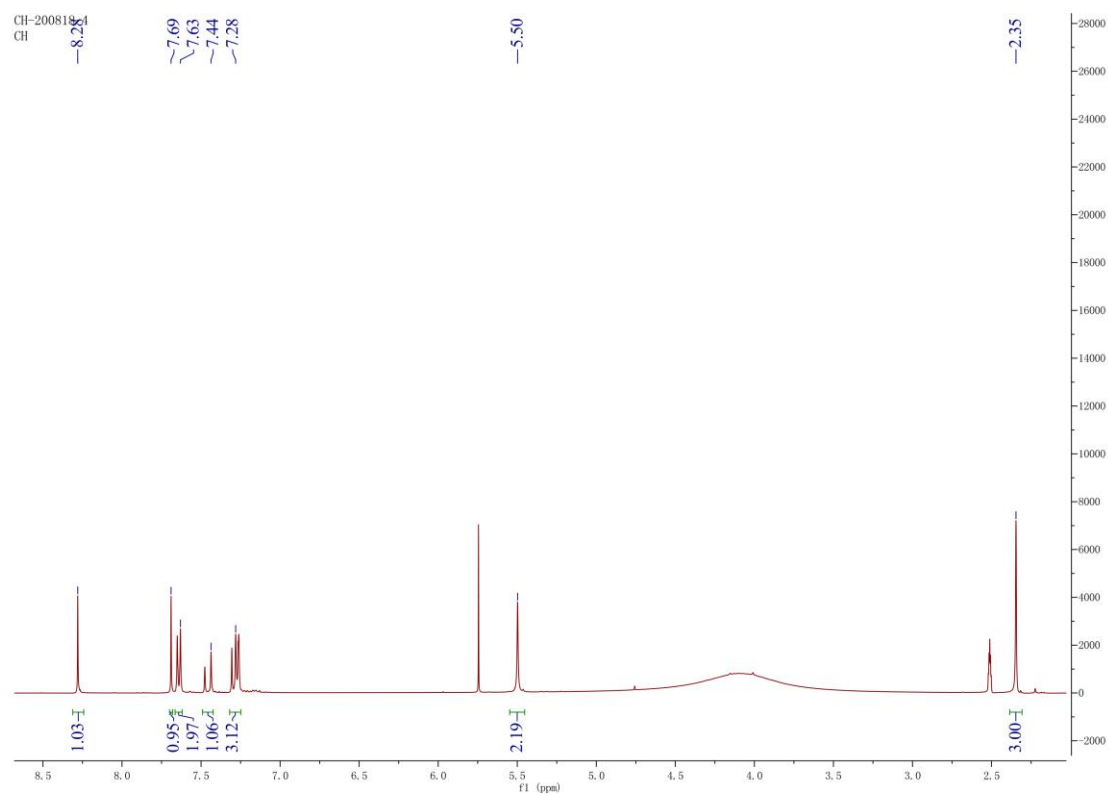Figure S3 <sup>1</sup>H-NMR (400 MHz, DMSO-*d*<sub>6</sub>) of **7b**

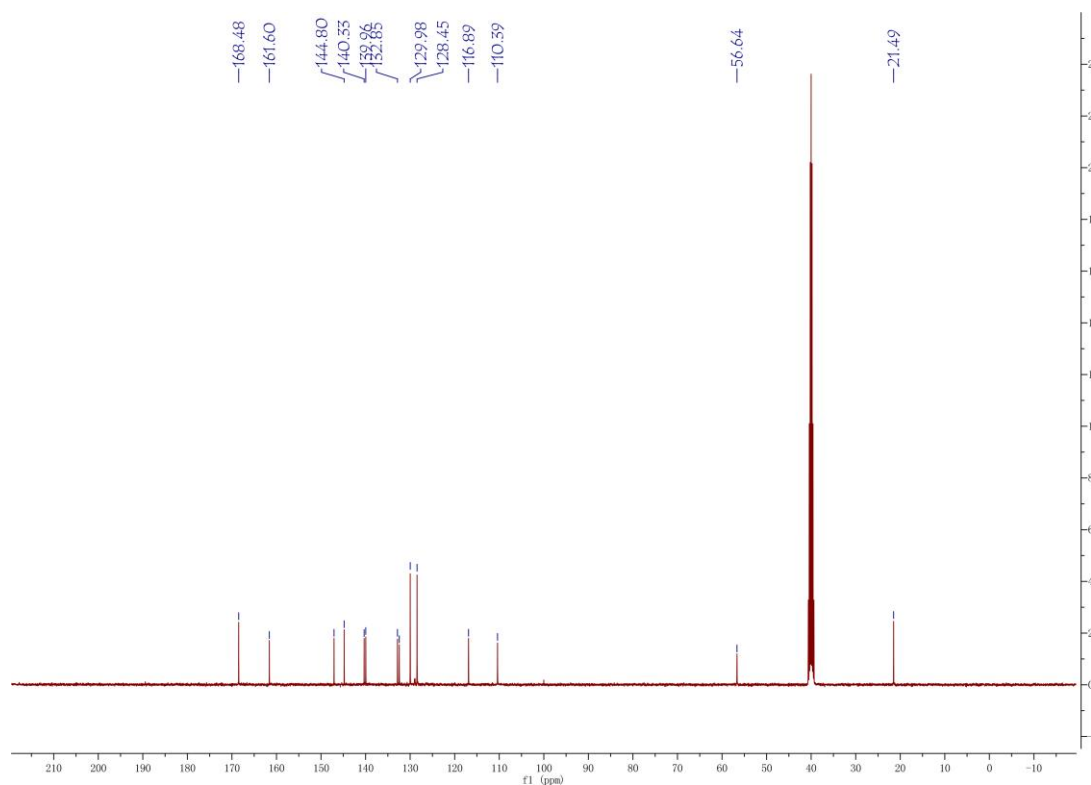**Figure S4** <sup>13</sup>C-NMR (100 MHz, DMSO-*d*<sub>6</sub>) of **7b**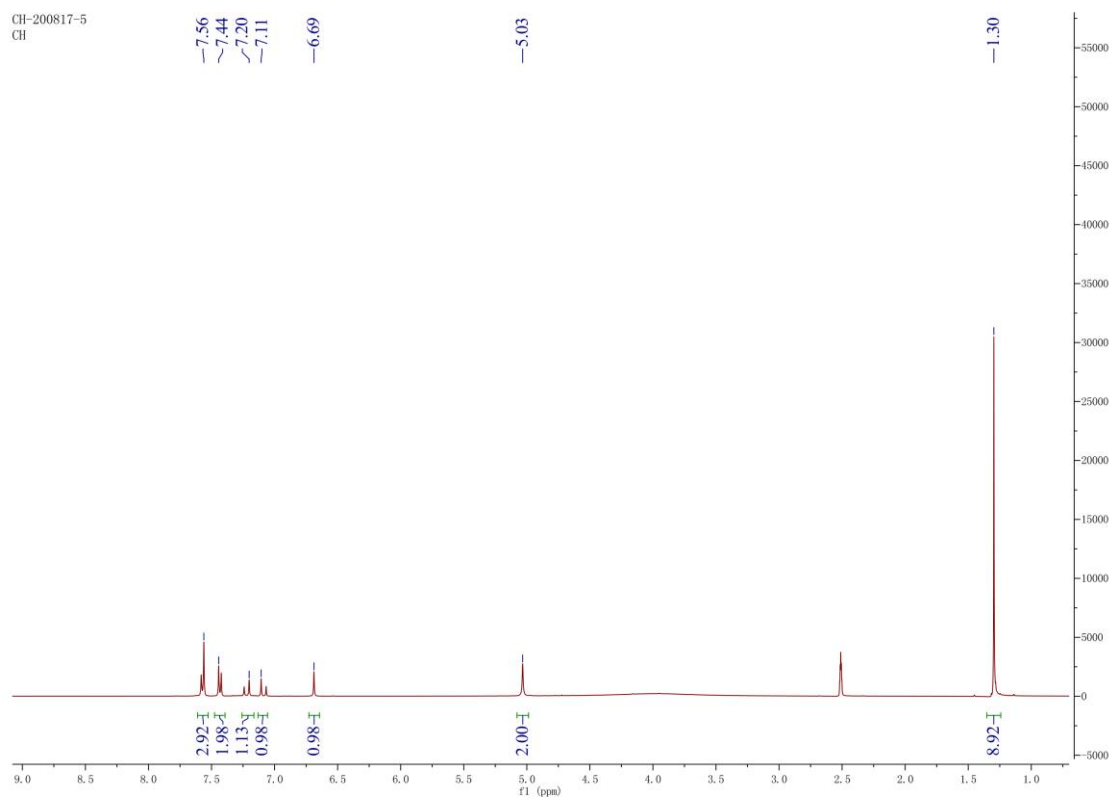**Figure S5** <sup>1</sup>H-NMR (400 MHz, DMSO-*d*<sub>6</sub>) of **7c**

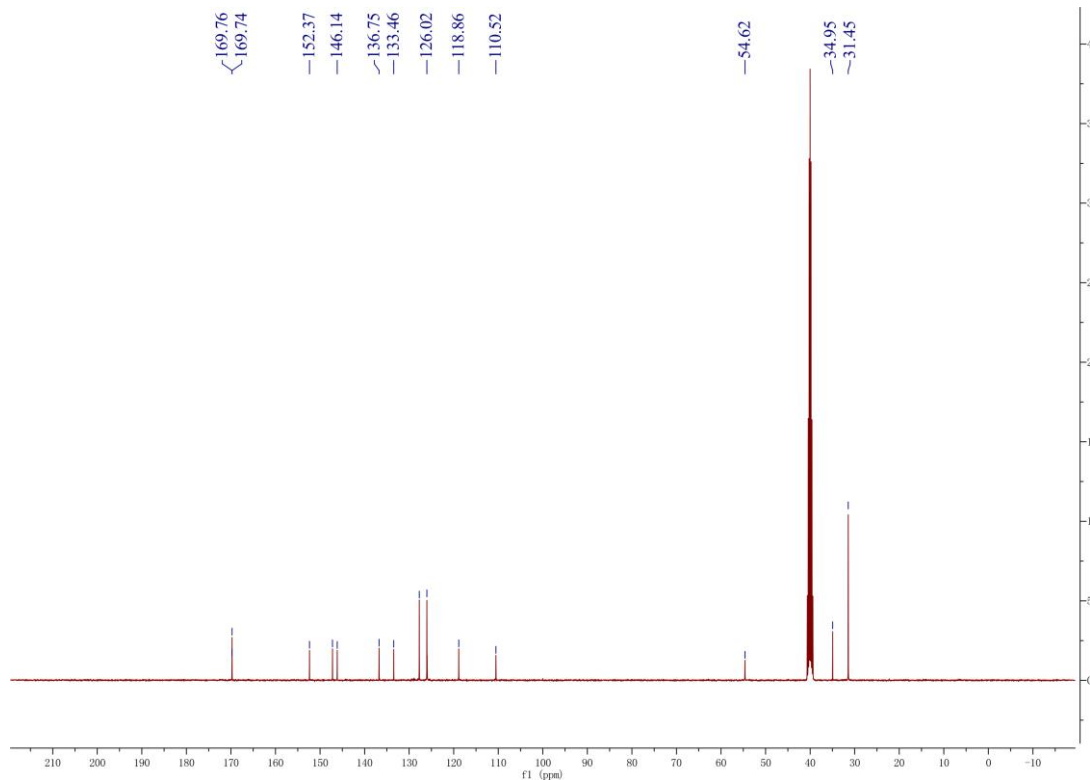**Figure S6** <sup>13</sup>C-NMR (100 MHz, DMSO-*d*<sub>6</sub>) of 7c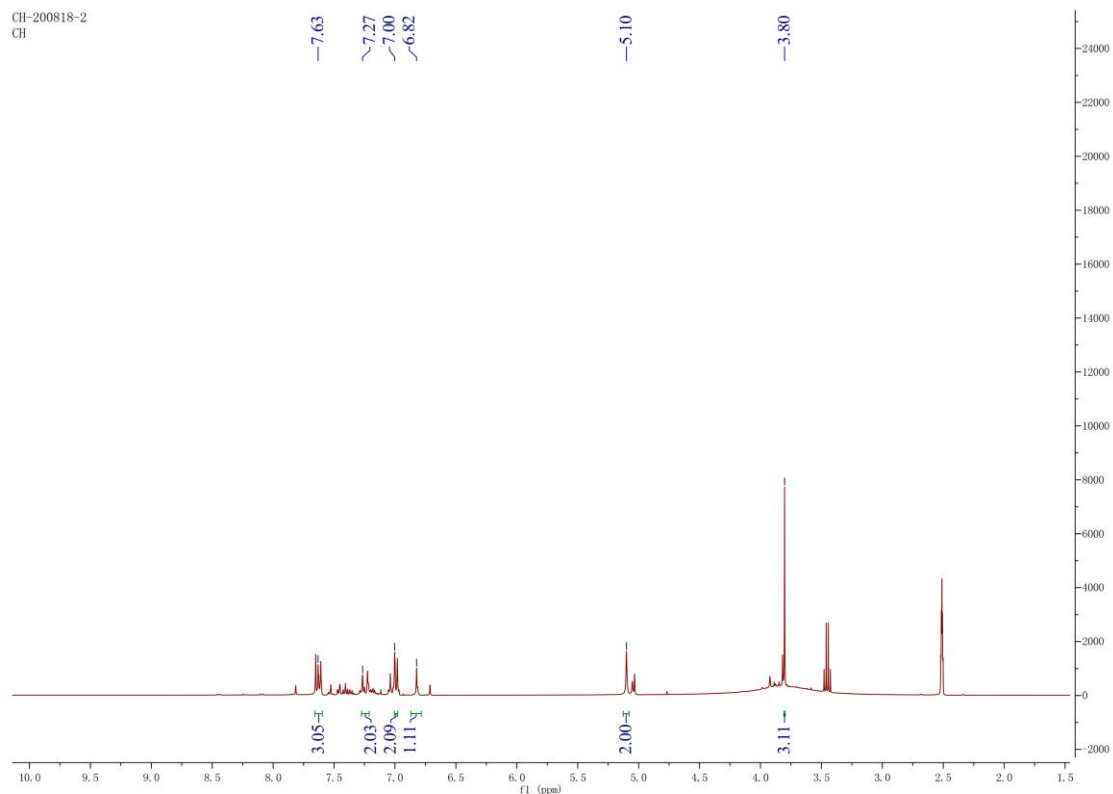**Figure S7** <sup>1</sup>H-NMR (400 MHz, DMSO-*d*<sub>6</sub>) of 7d

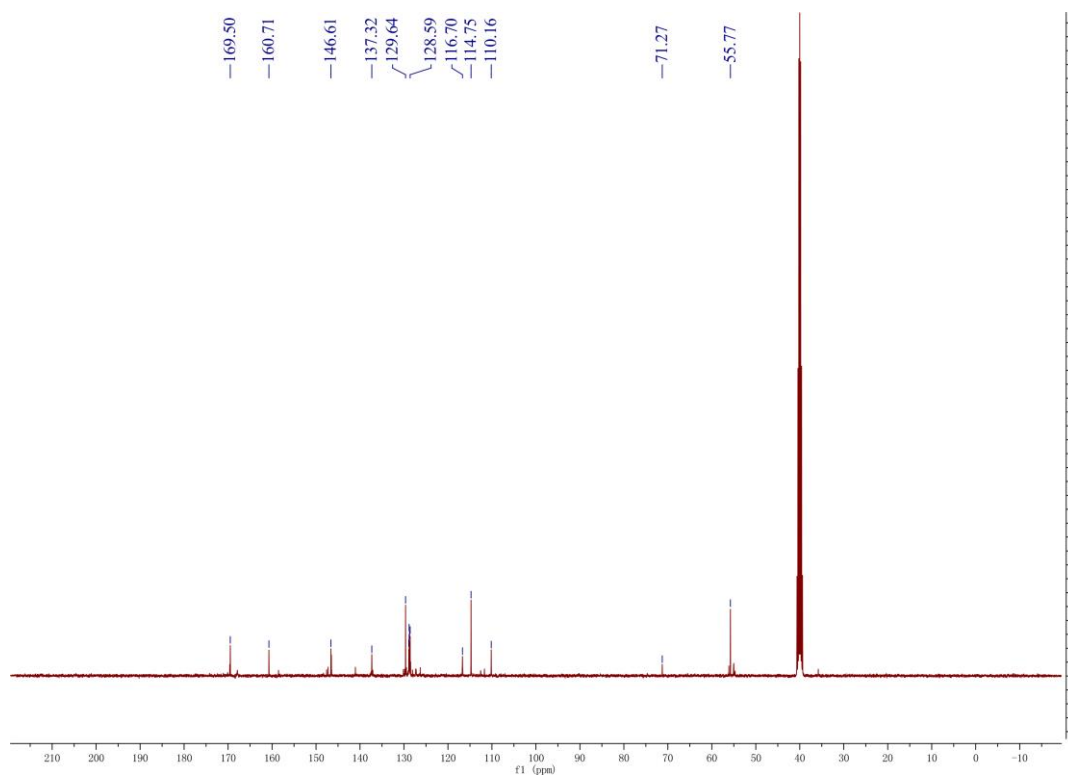

**Figure S8** <sup>13</sup>C-NMR (100 MHz, DMSO-*d*<sub>6</sub>) of 7d

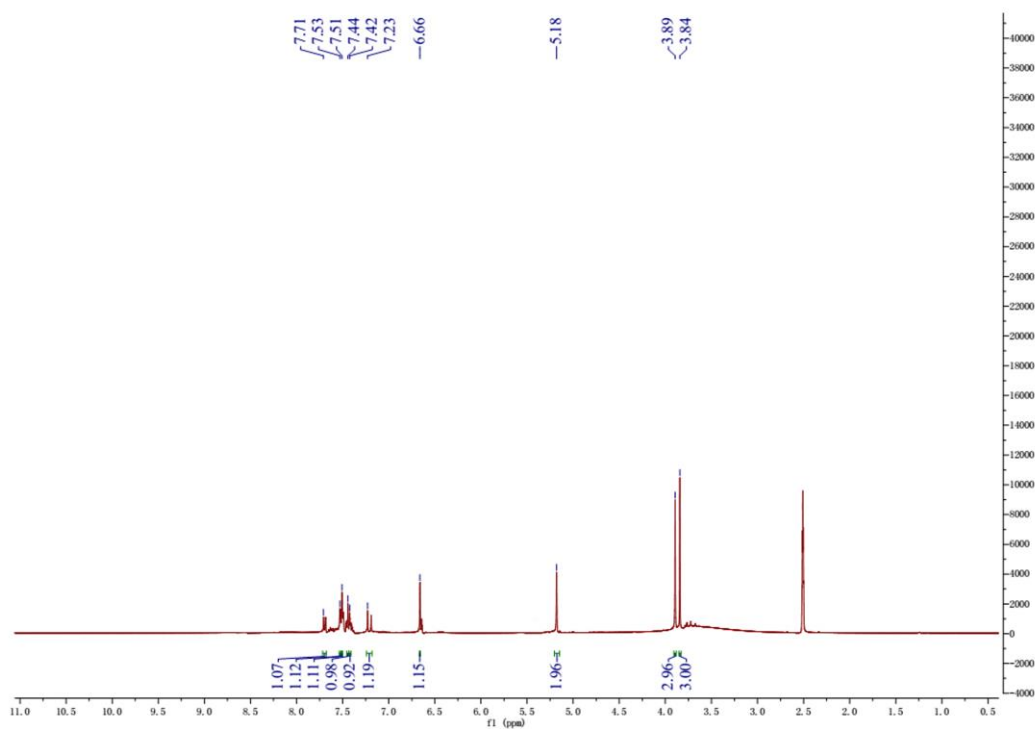

**Figure S9** <sup>1</sup>H-NMR (400 MHz, DMSO-*d*<sub>6</sub>) of 7e

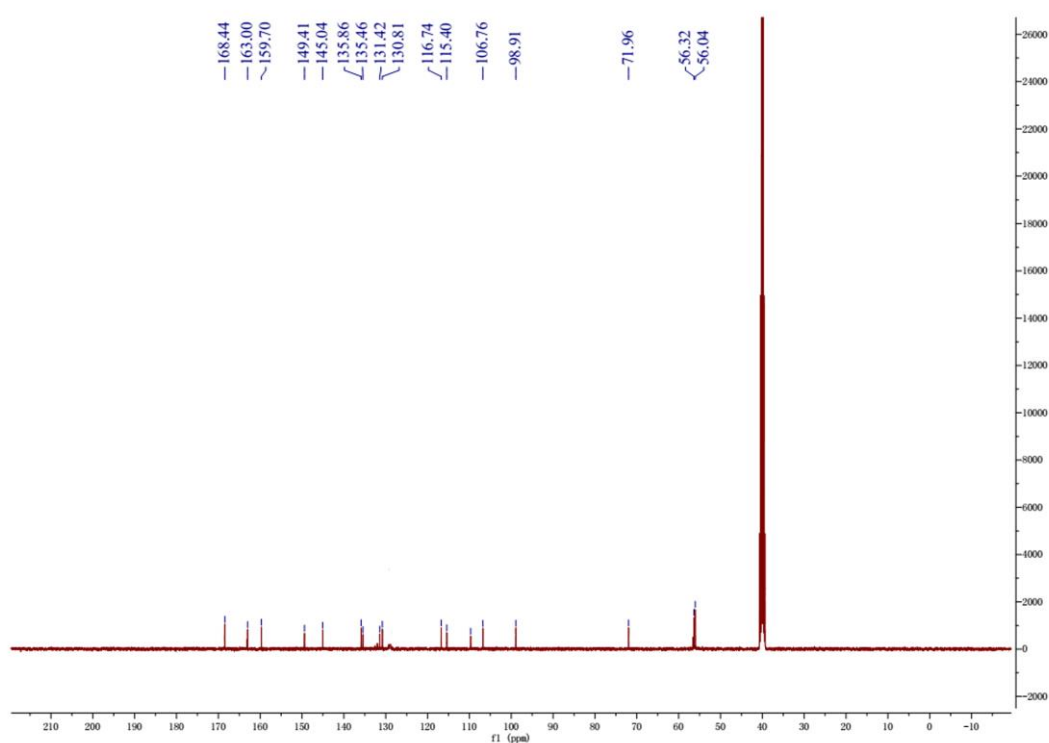

Figure S10  $^{13}\text{C}$ -NMR (100 MHz,  $\text{DMSO-}d_6$ ) of 7e

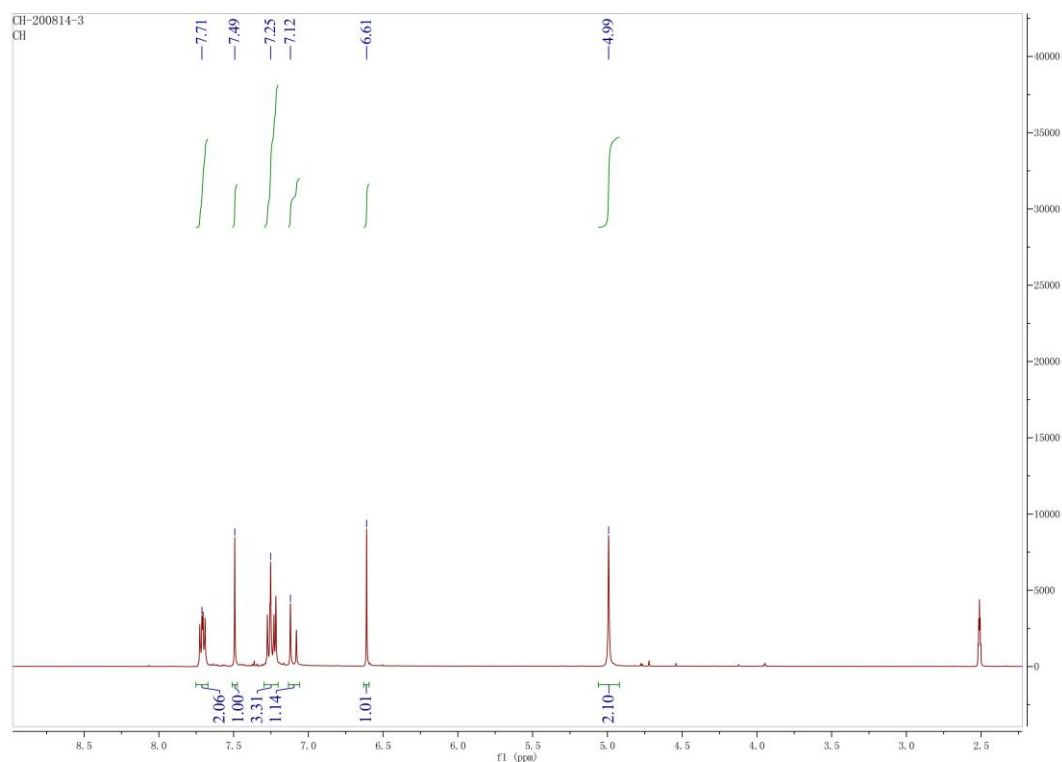

Figure S11  $^1\text{H}$ -NMR (400 MHz,  $\text{DMSO-}d_6$ ) of 7f

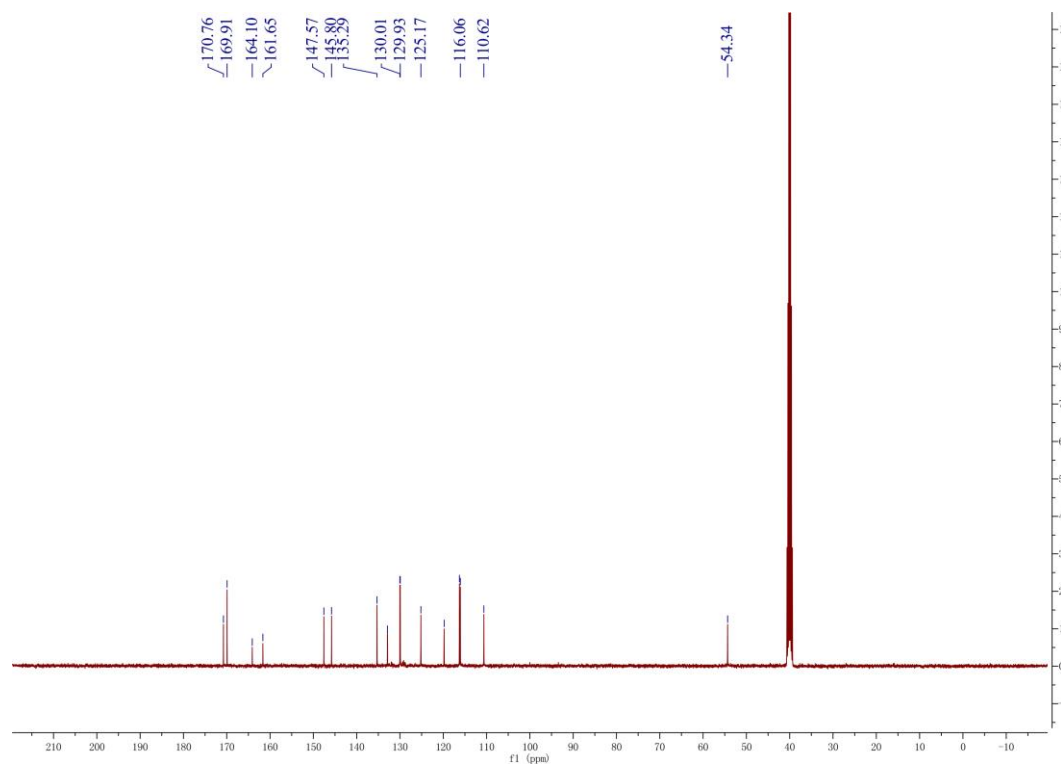**Figure S12** <sup>13</sup>C-NMR (100 MHz, DMSO-*d*<sub>6</sub>) of 7f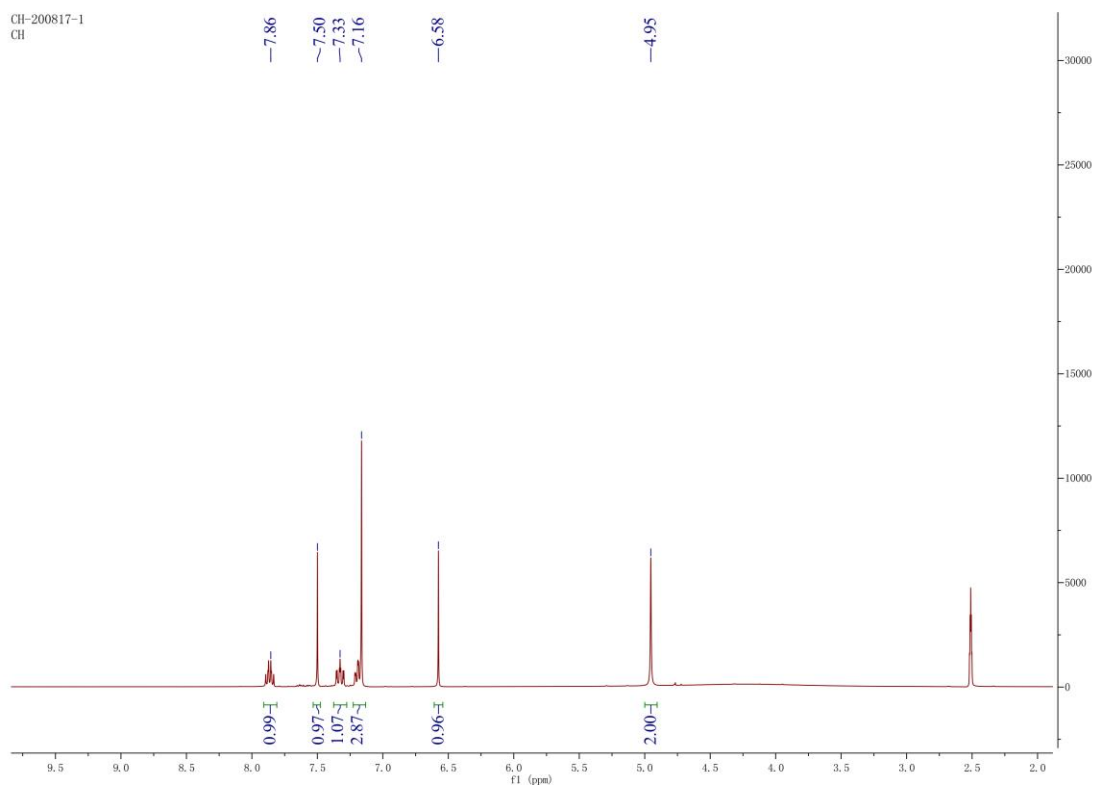**Figure S13** <sup>1</sup>H-NMR (400 MHz, DMSO-*d*<sub>6</sub>) of 7g

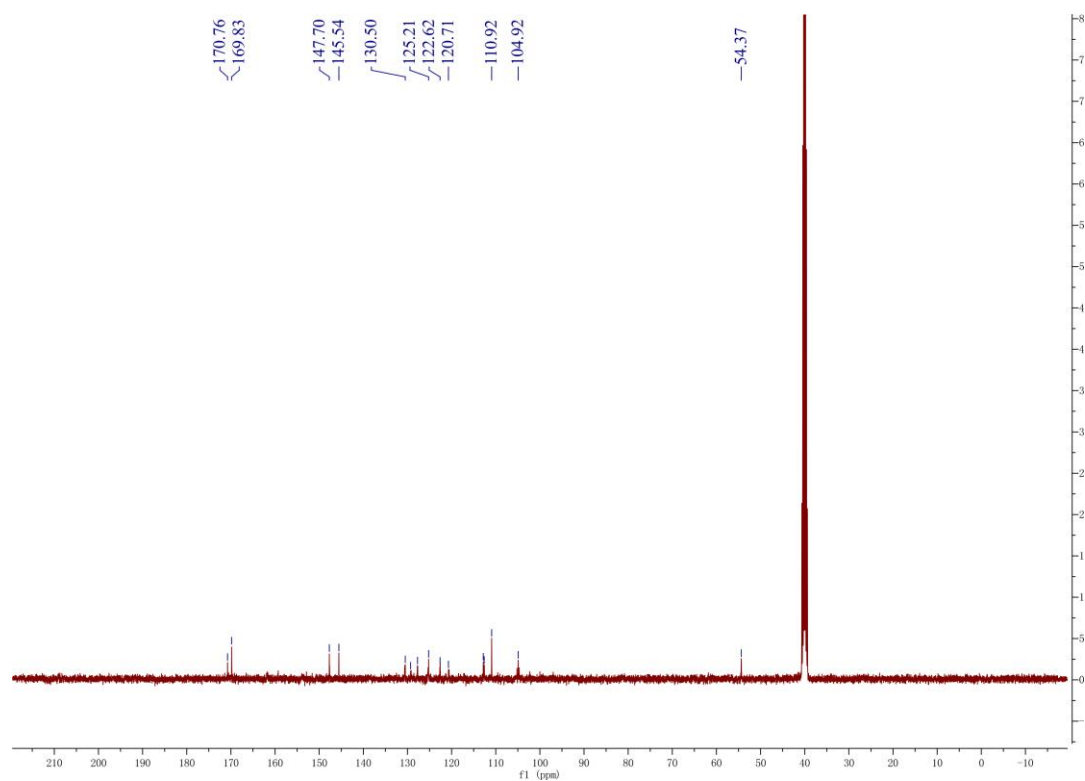Figure S14 <sup>13</sup>C-NMR (100 MHz, DMSO-*d*<sub>6</sub>) of 7g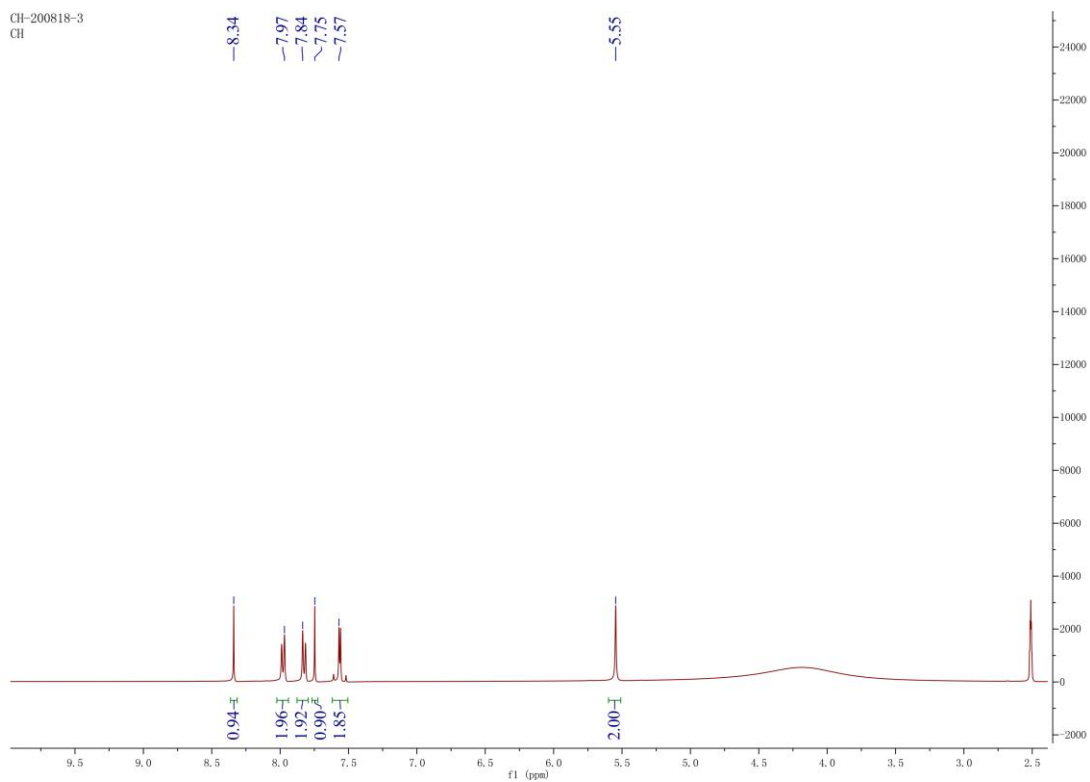Figure S15 <sup>1</sup>H-NMR (400 MHz, DMSO-*d*<sub>6</sub>) of 7h



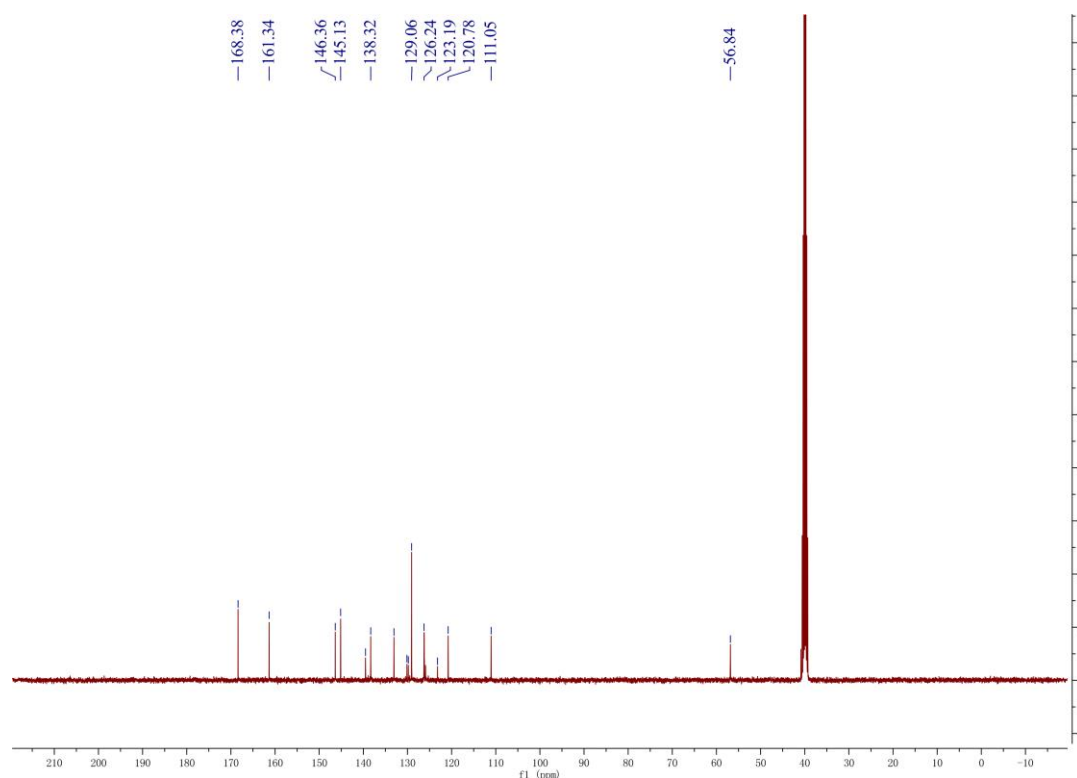**Figure S16**  $^{13}\text{C}$ -NMR (100 MHz,  $\text{DMSO}-d_6$ ) of **7h**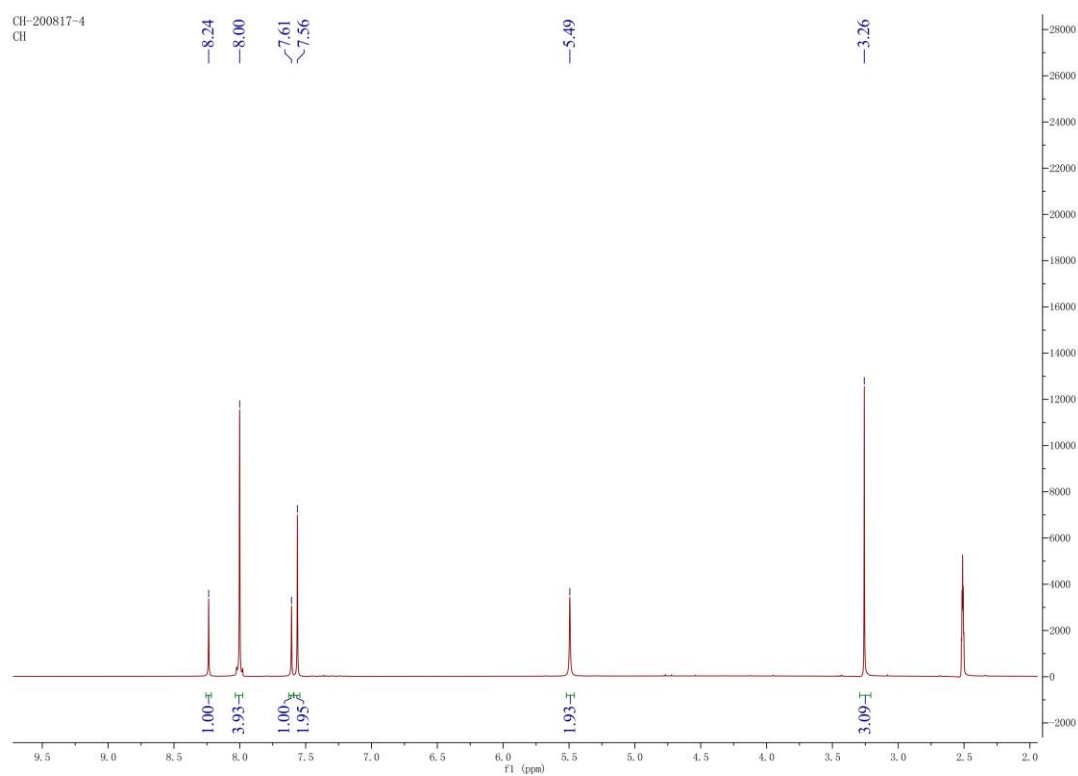**Figure S17**  $^1\text{H}$ -NMR (400 MHz,  $\text{DMSO}-d_6$ ) of **7i**

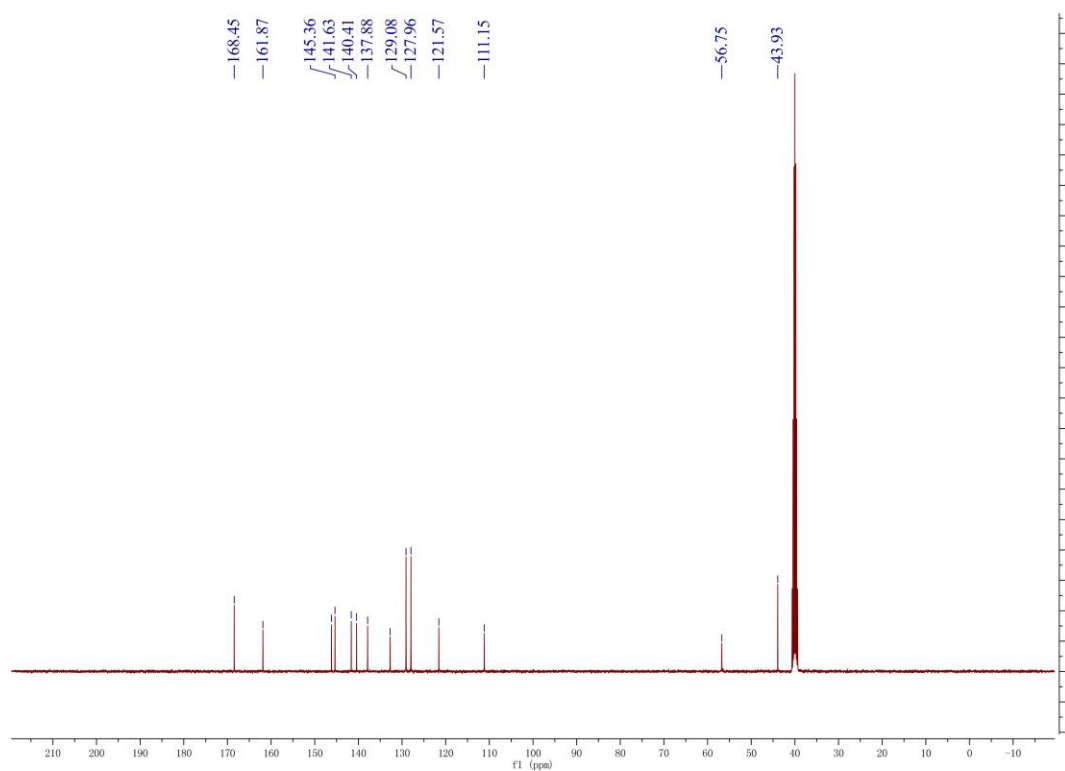**Figure S18**  $^{13}\text{C}$ -NMR (100 MHz,  $\text{DMSO-}d_6$ ) of **7i**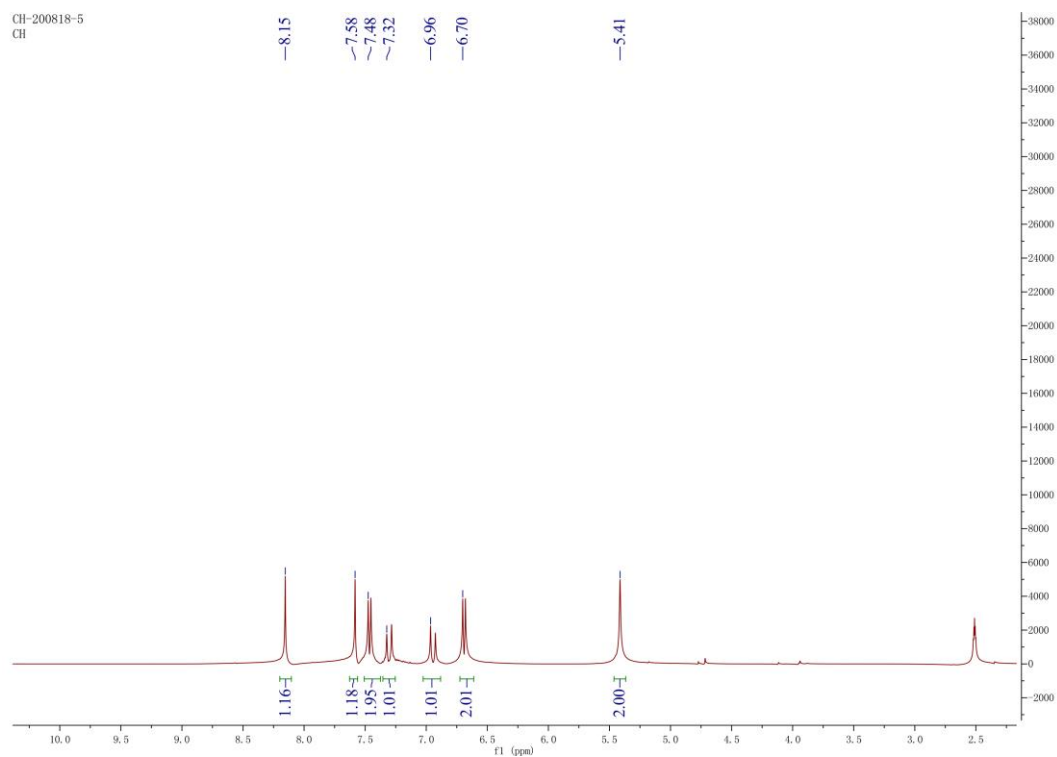**Figure S19**  $^1\text{H}$ -NMR (400 MHz,  $\text{DMSO-}d_6$ ) of **7j**

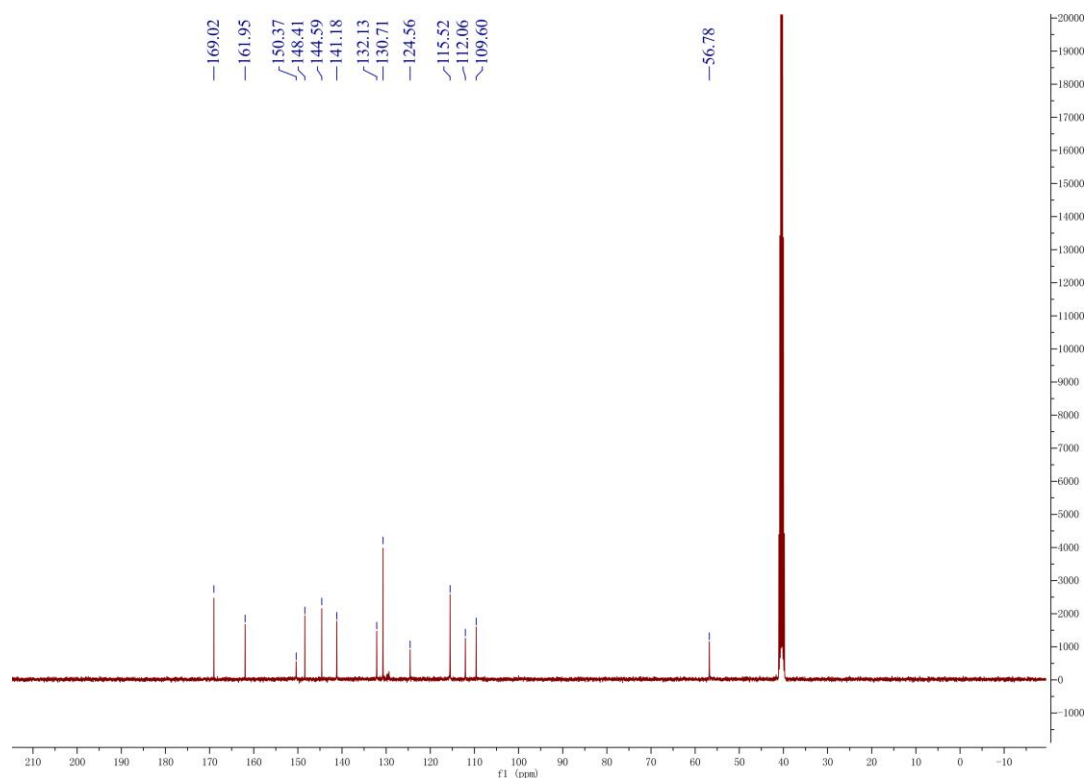

Figure S20  $^{13}\text{C}$ -NMR (100 MHz,  $\text{DMSO-}d_6$ ) of 7j

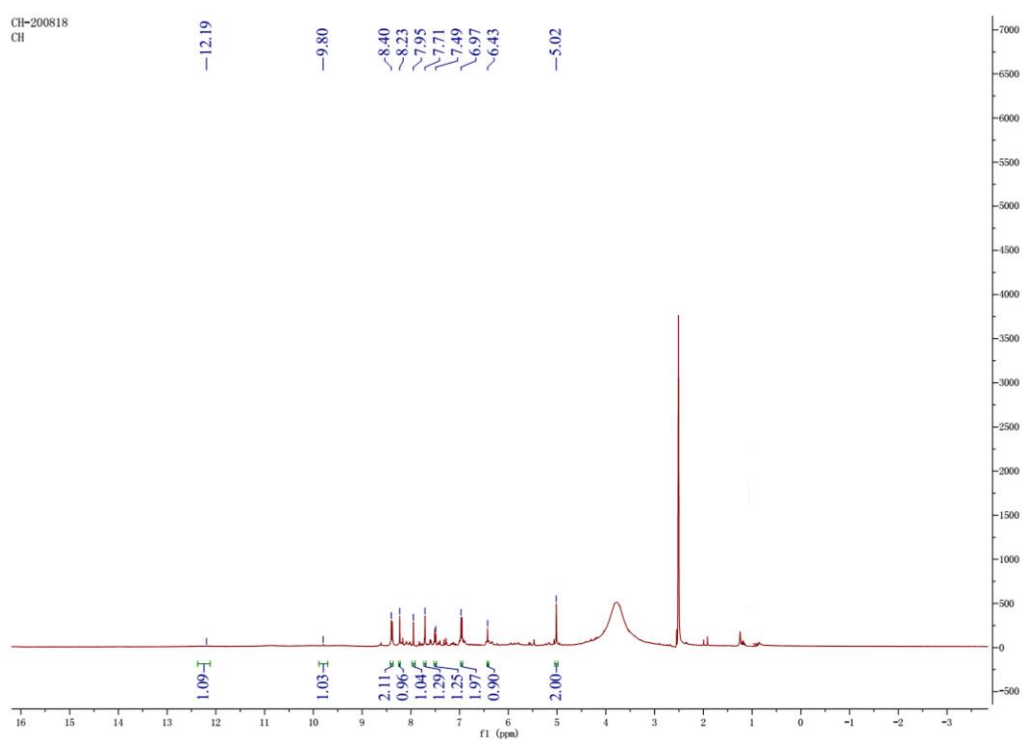

Figure S21  $^1\text{H}$ -NMR (400 MHz,  $\text{DMSO-}d_6$ ) of 7k

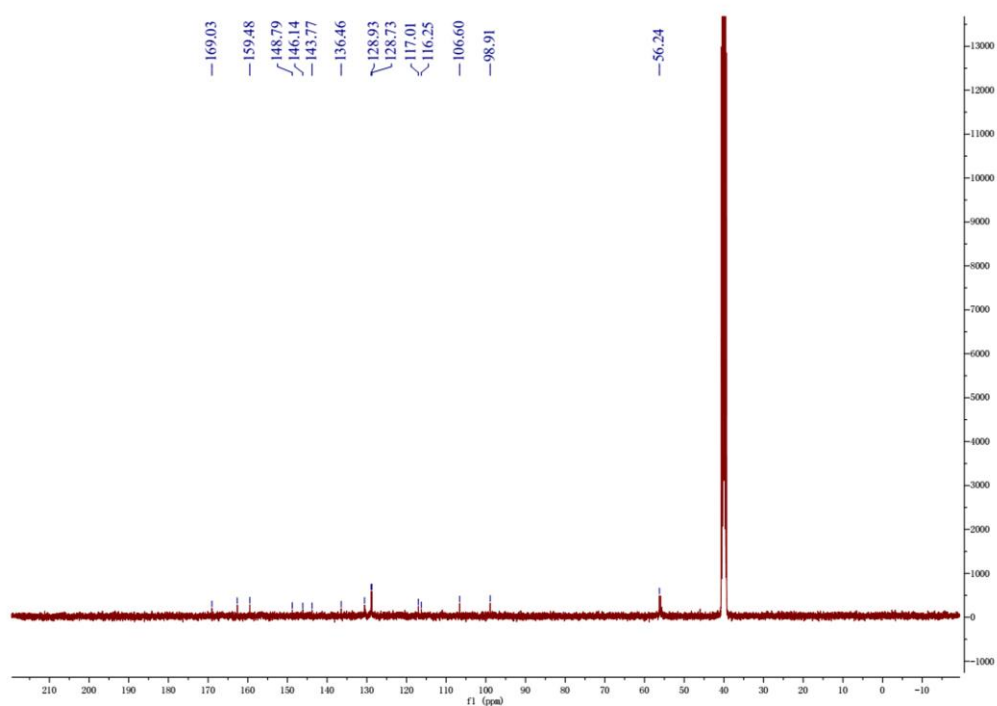

Figure S22  $^{13}\text{C}$ -NMR (100 MHz,  $\text{DMSO}-d_6$ ) of 7k

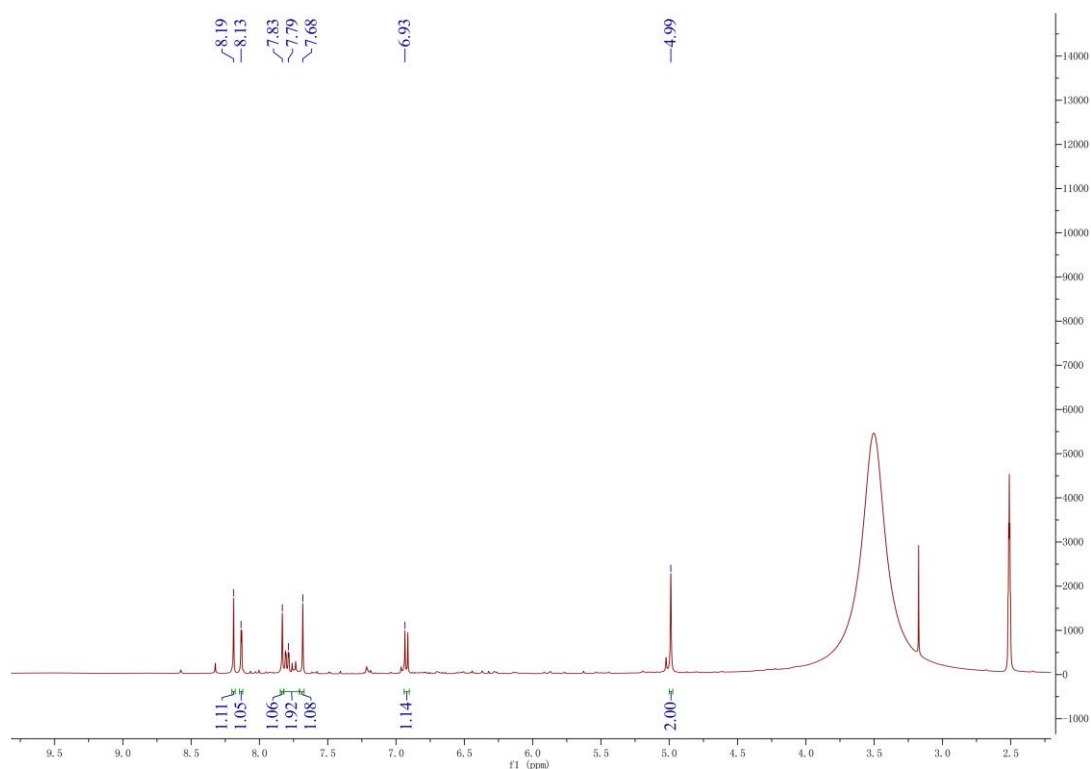

Figure S23  $^1\text{H}$ -NMR (400 MHz,  $\text{DMSO}-d_6$ ) of 7k

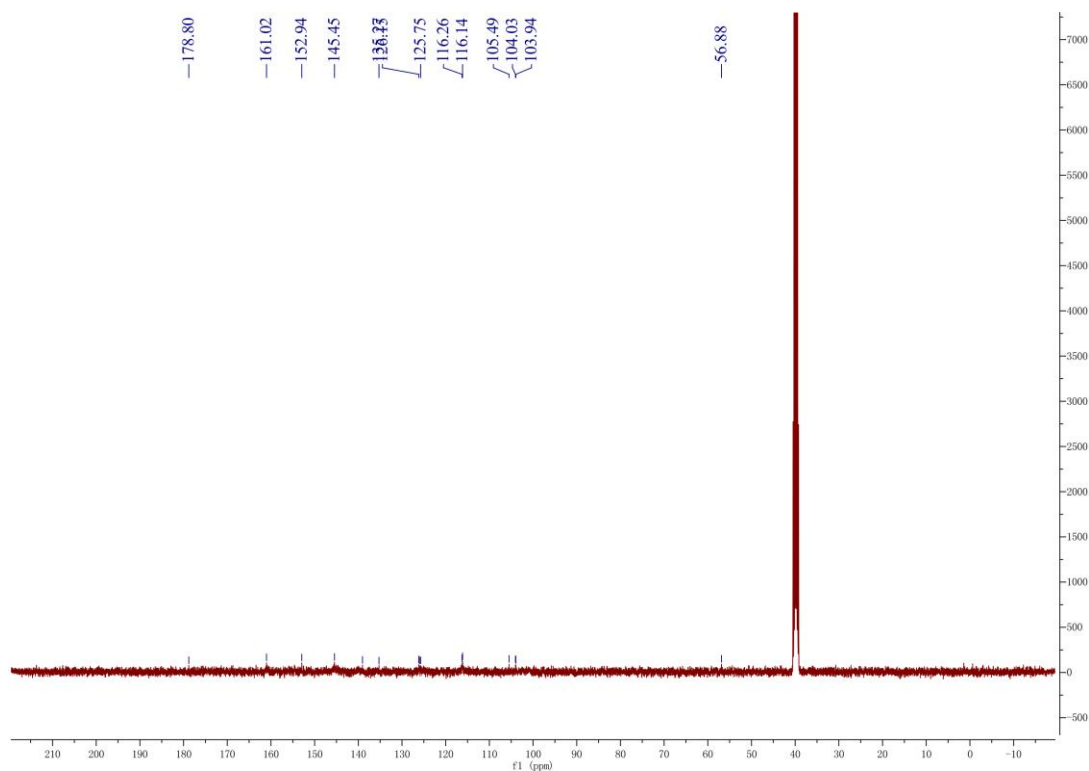**Figure S24** <sup>13</sup>C-NMR (100 MHz, DMSO-*d*<sub>6</sub>) of 7l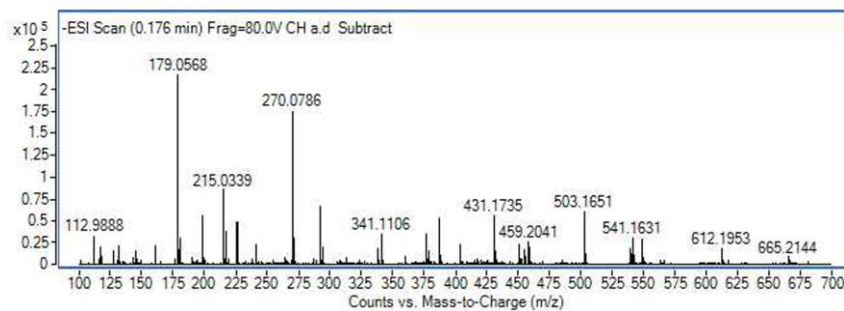**Figure S25** HRMS of 7a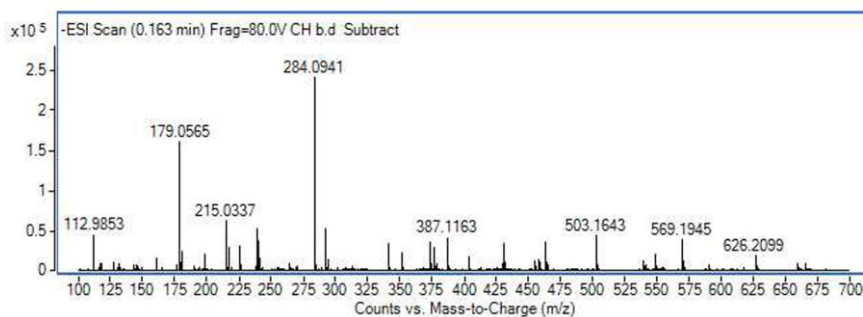**Figure S26** HRMS of 7b

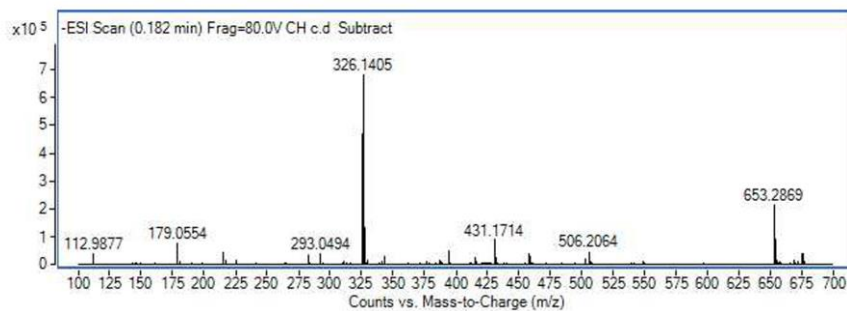

Figure S27 HRMS of 7c

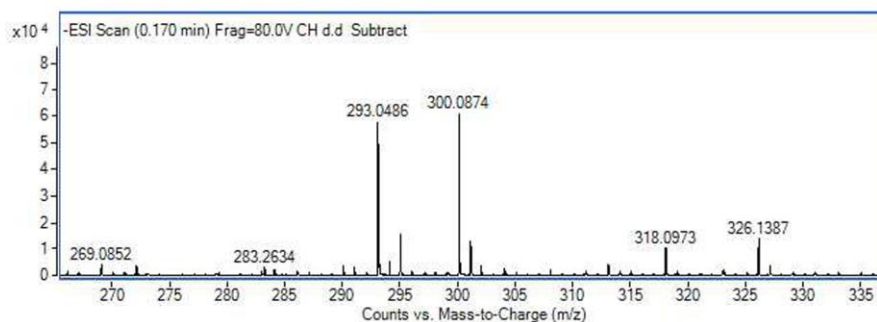

Figure S28 HRMS of 7d

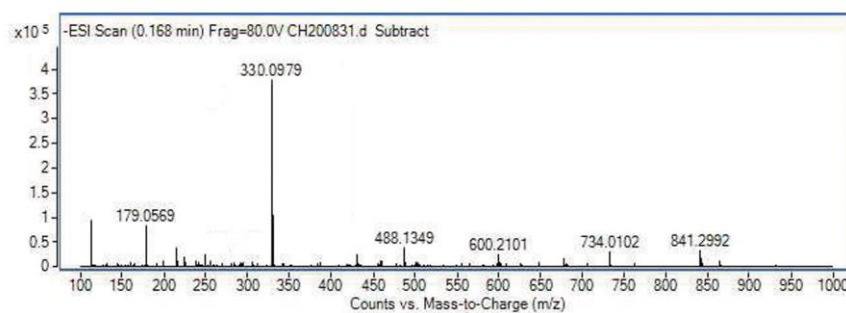

Figure S29 HRMS of 7e

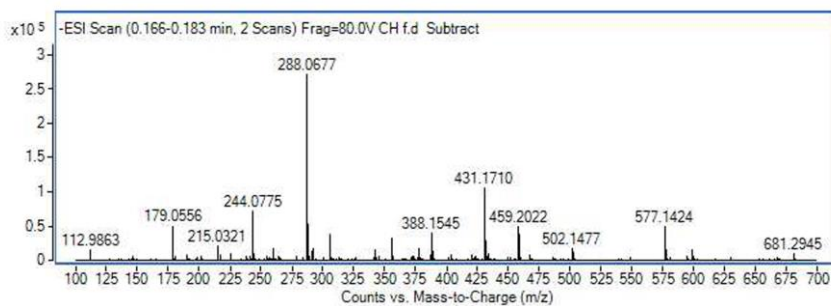

Figure S30 HRMS of 7f

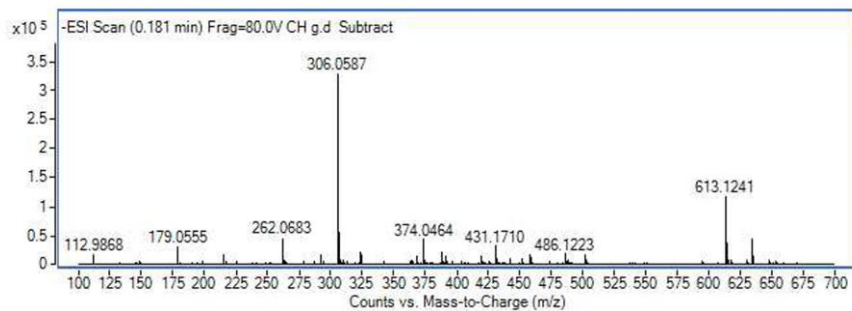

Figure S31 HRMS of 7g

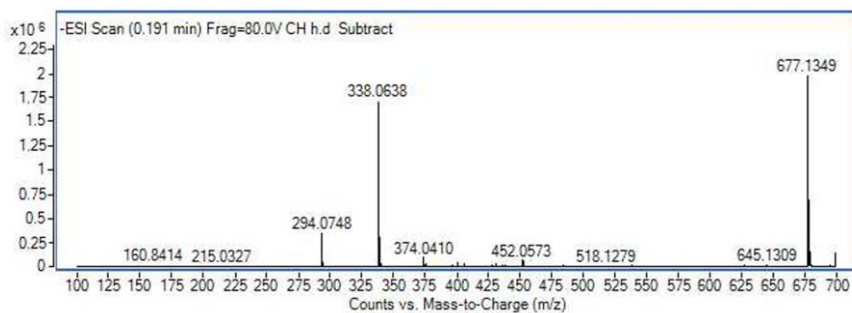

Figure S32 HRMS of 7h

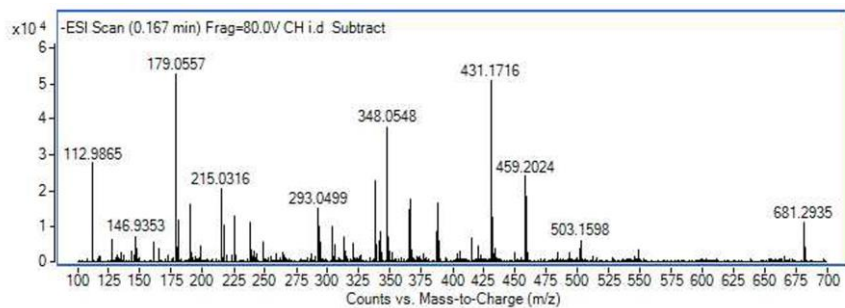

Figure S33 HRMS of 7i

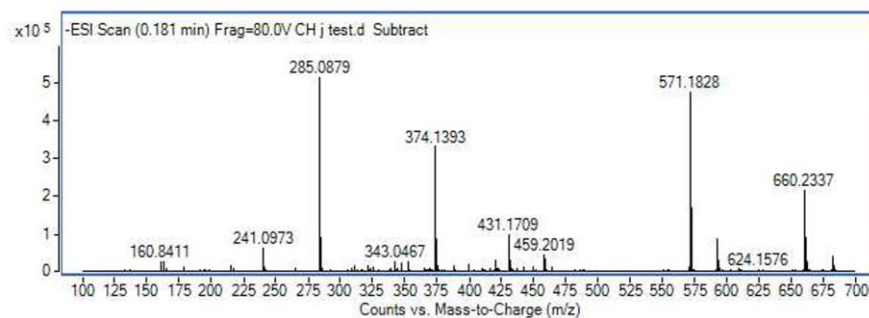

Figure S34 HRMS of 7j

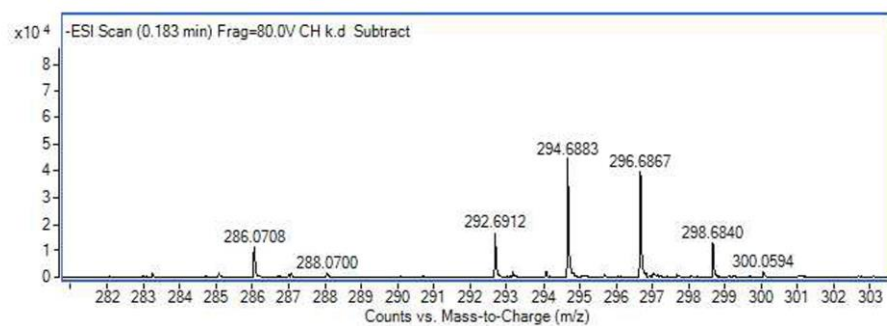

Figure S35 HRMS of 7k

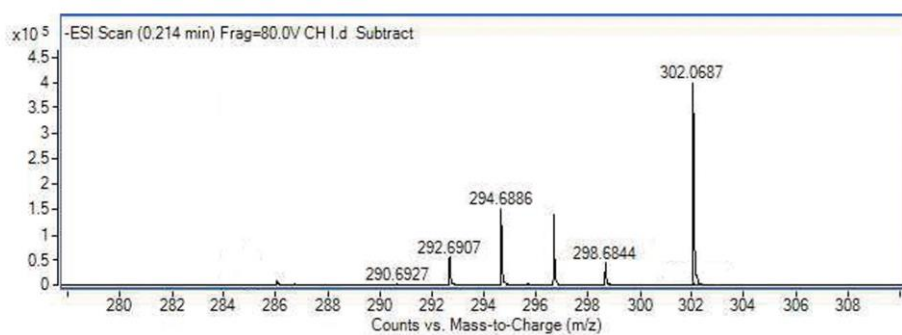

Figure S36 HRMS of 7l

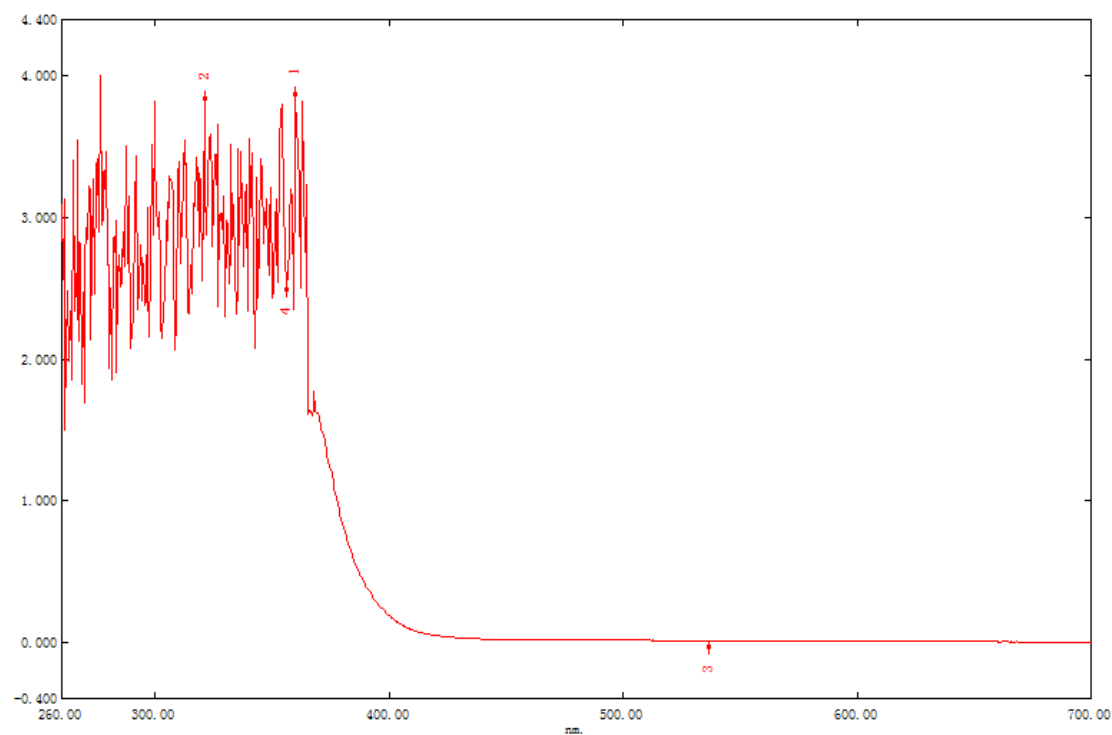

Figure S37 UV-Vis spectra of 7a



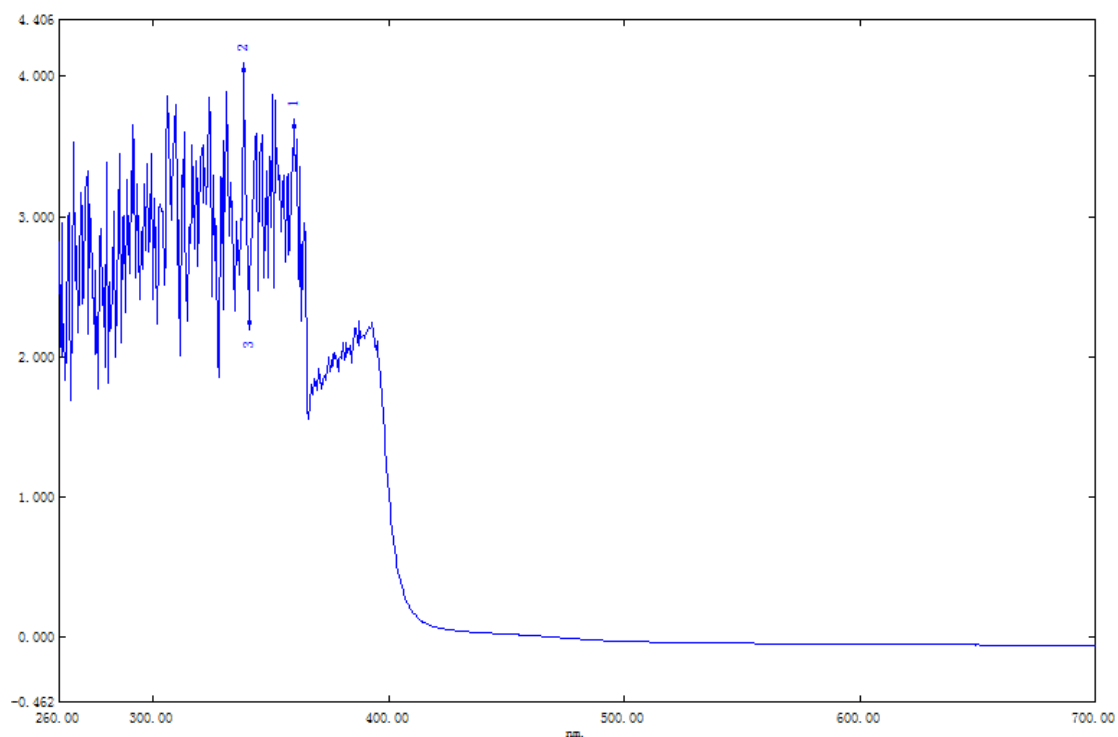**Figure S38** UV-Vis spectra of **7b**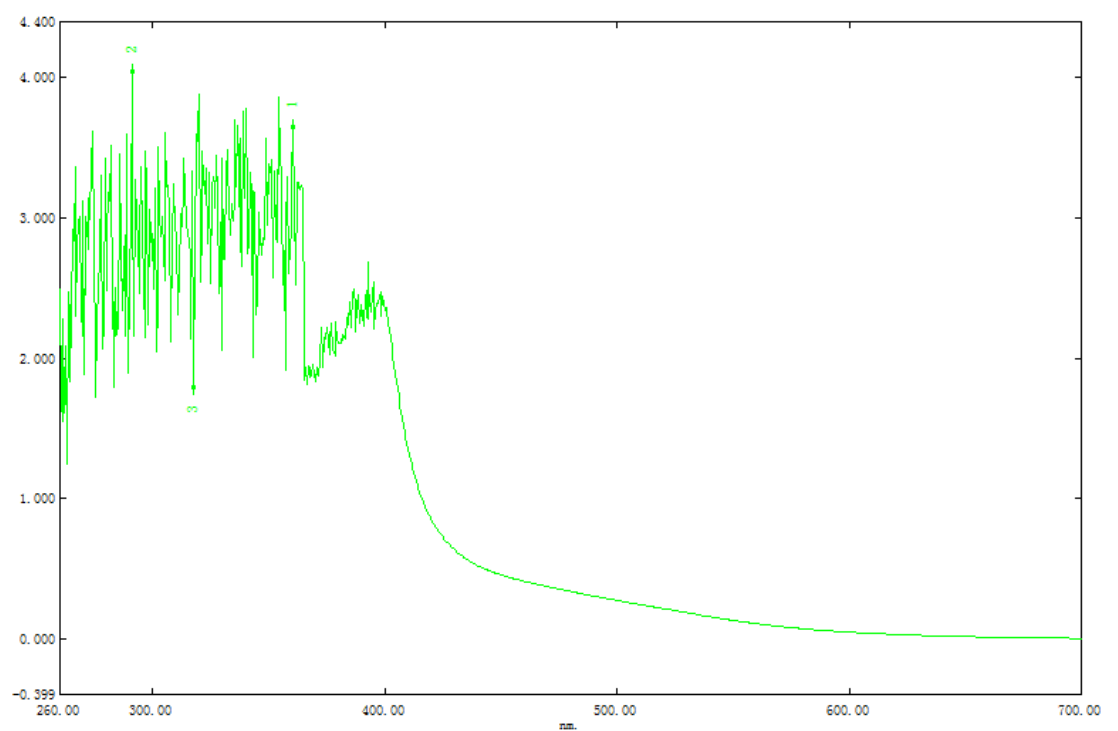**Figure S39** UV-Vis spectra of **7c**

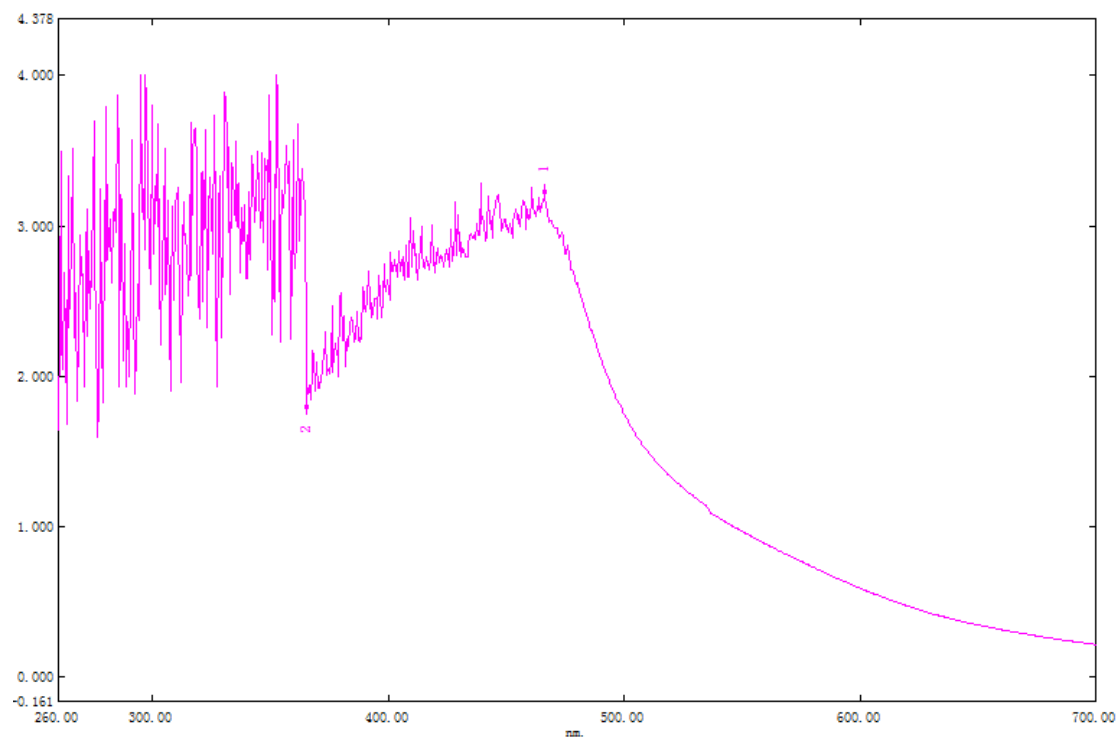

Figure S40 UV-Vis spectra of 7d

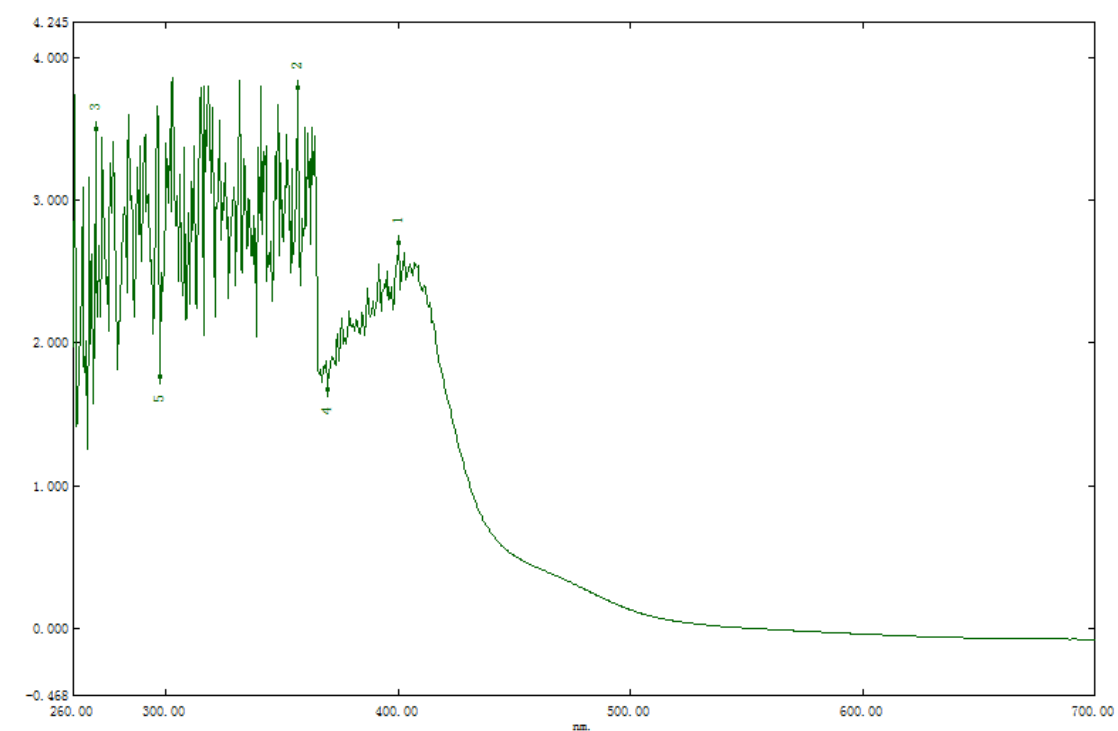

Figure S41 UV-Vis spectra of 7e

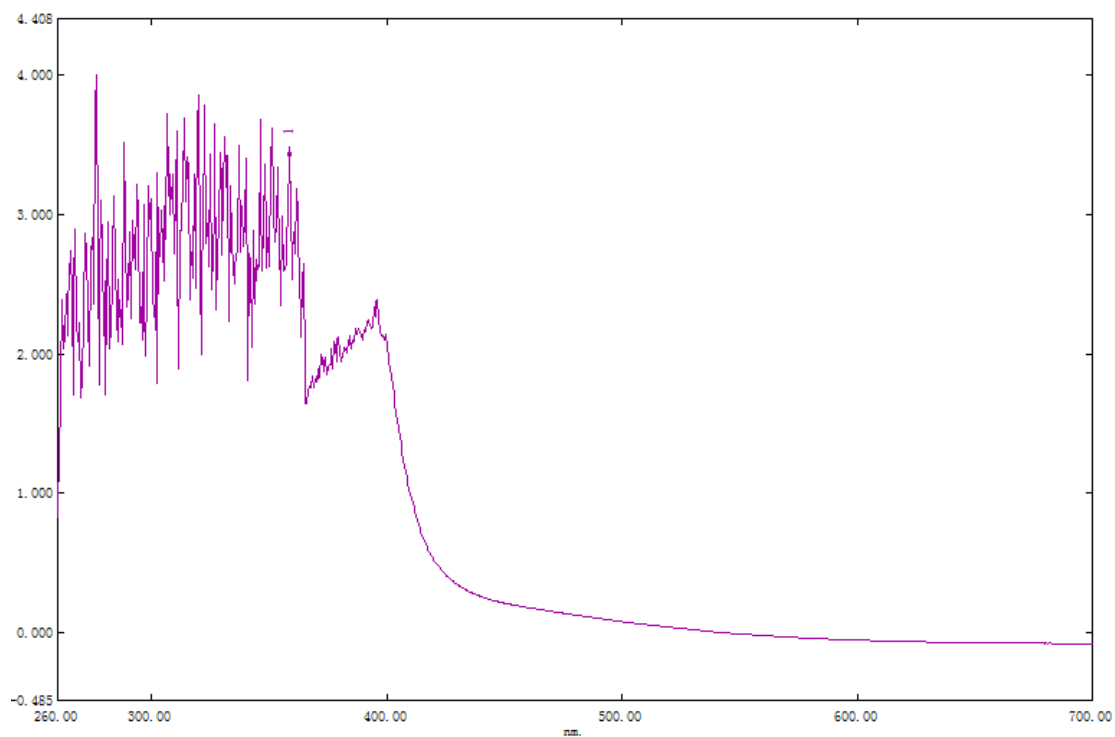

Figure S42 UV-Vis spectra of 7f

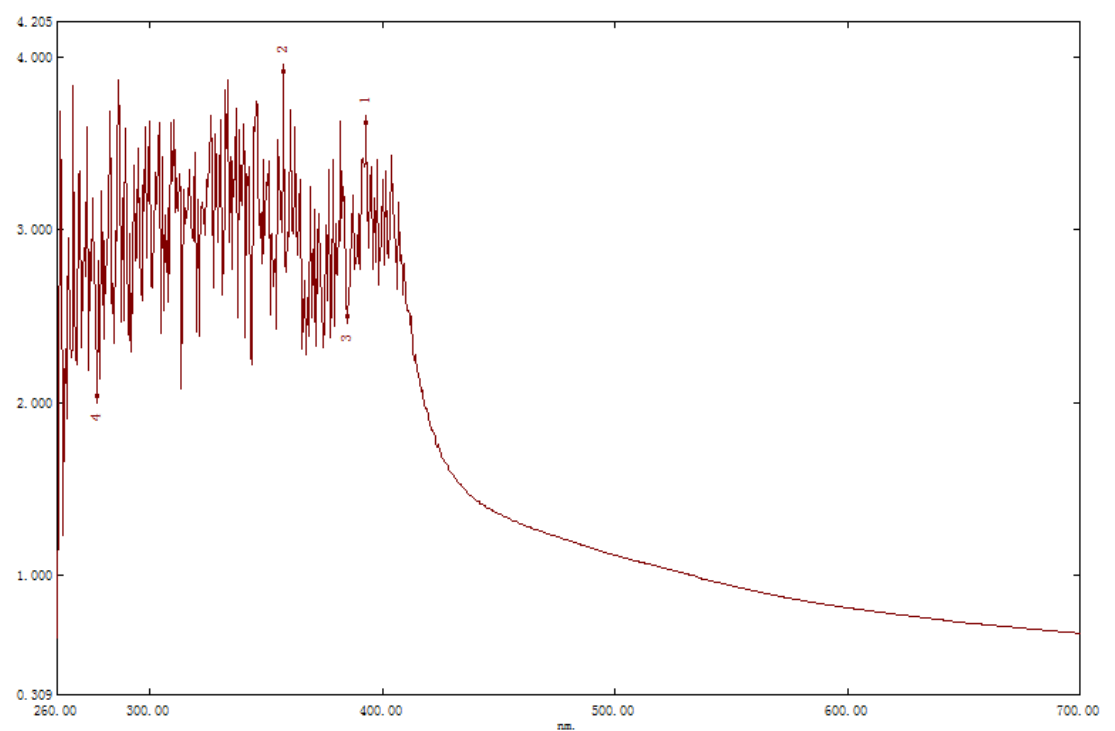

Figure S43 UV-Vis spectra of 7g

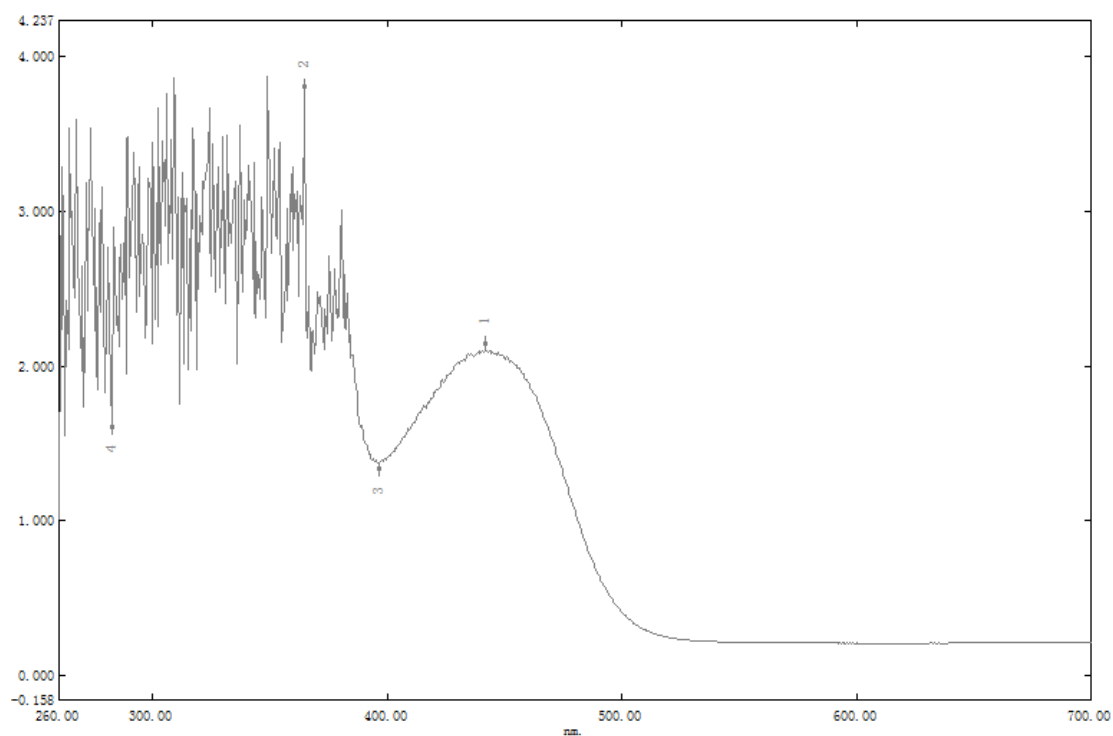**Figure S44** UV-Vis spectra of 7h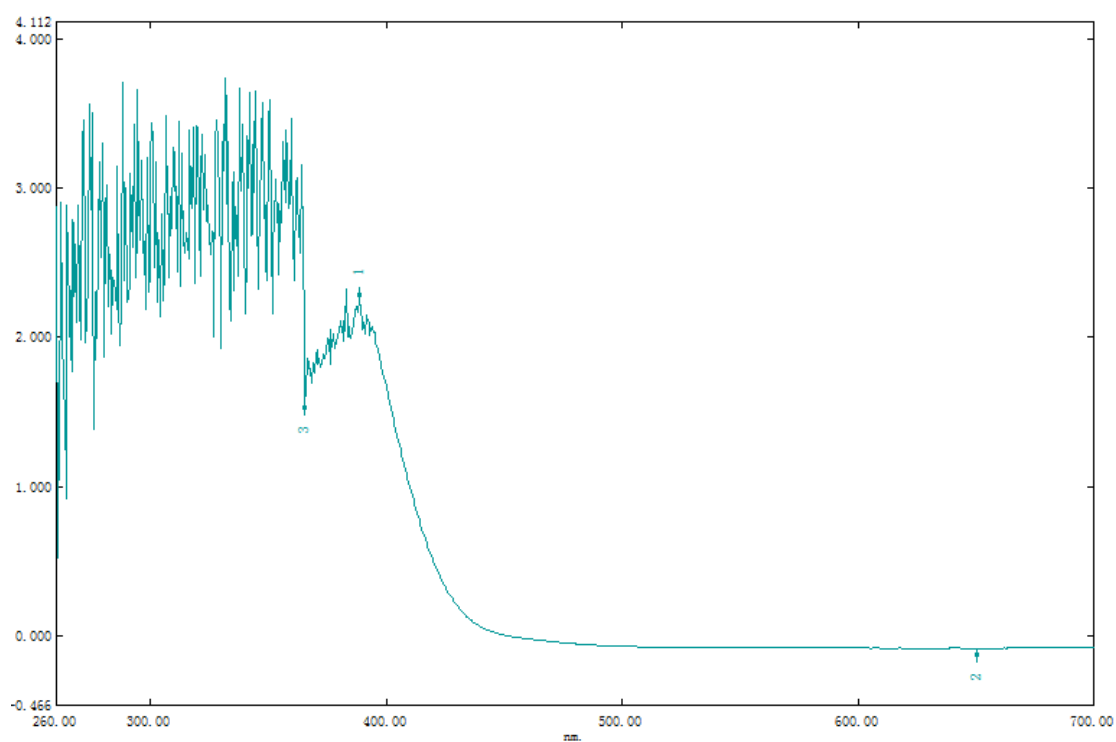**Figure S45** UV-Vis spectra of 7i

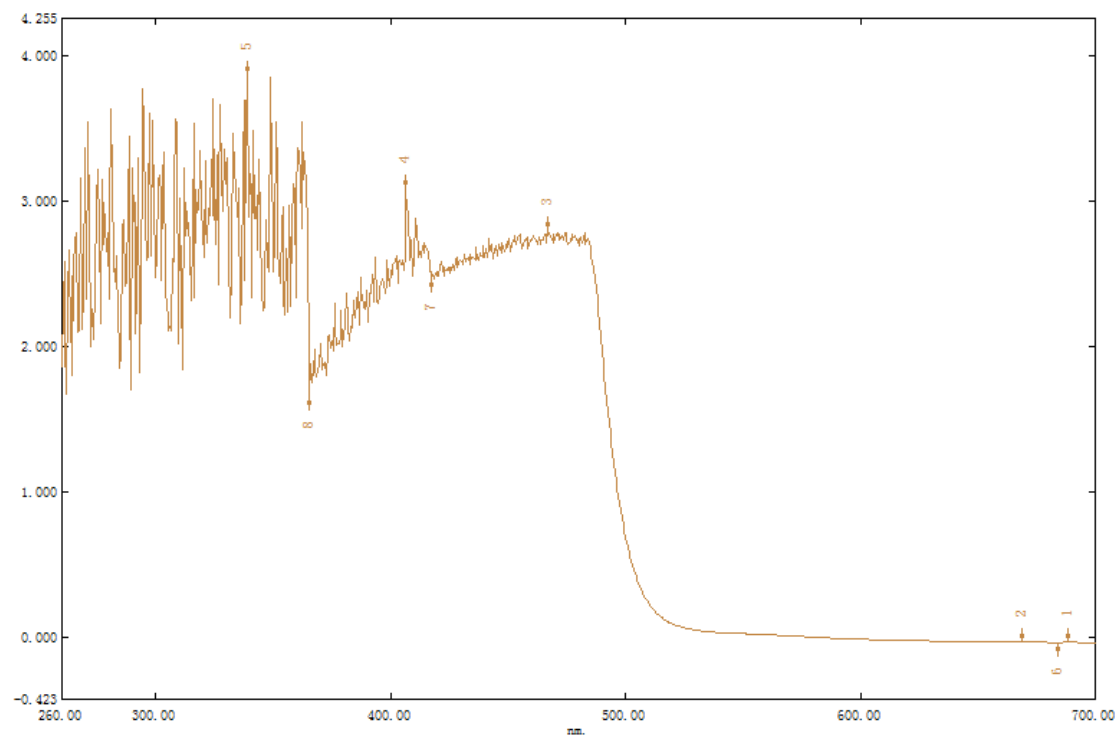**Figure S46** UV-Vis spectra of 7j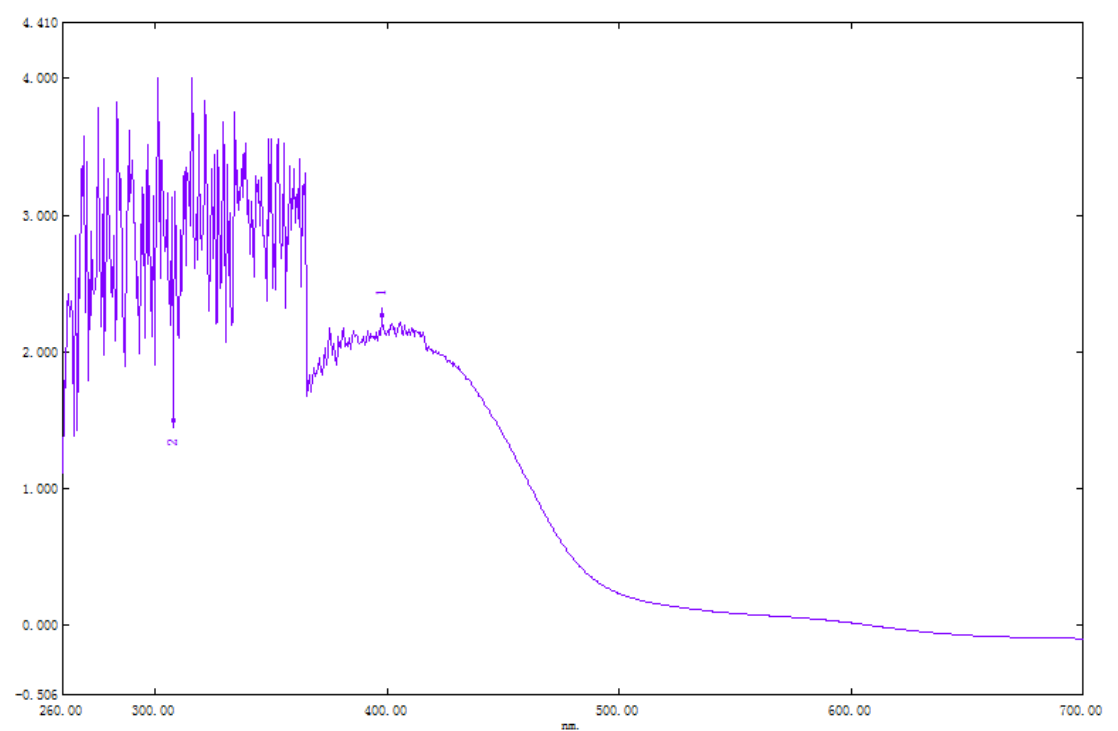**Figure S47** UV-Vis spectra of 7k

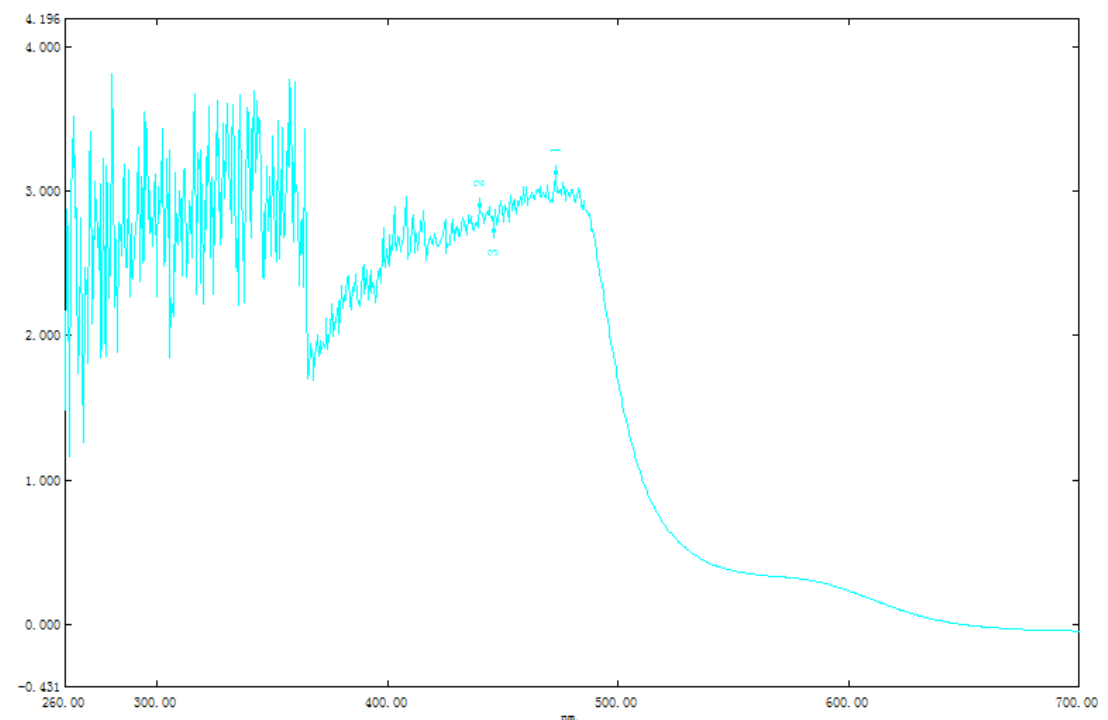

Figure S48 UV-Vis spectra of 71
